# Supplementary material for: Methane production by three widespread marine phytoplankton species: release rates, precursor compounds, and relevance for the environment
Source: Copernicus journal article supplement (doi:10.5194/bg-2019-245), 2019-07-01
Supplement: Supplementary file 1 [file bg-2019-245-supplement.pdf]

## Supplementary

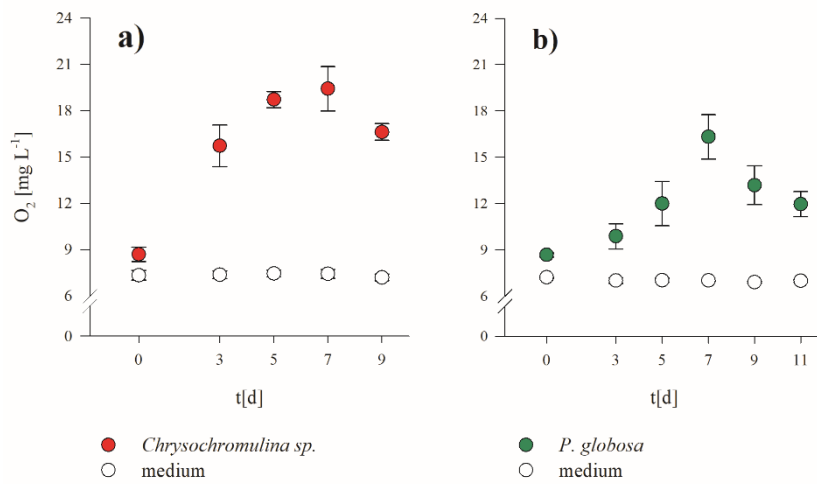

**S1: Dissolved oxygen concentration in course of time from algae species *Chrysochromulina sp.* and *P. globosa*. Mean values of six replicated culture experiments are shown and error bars mark the SD.**

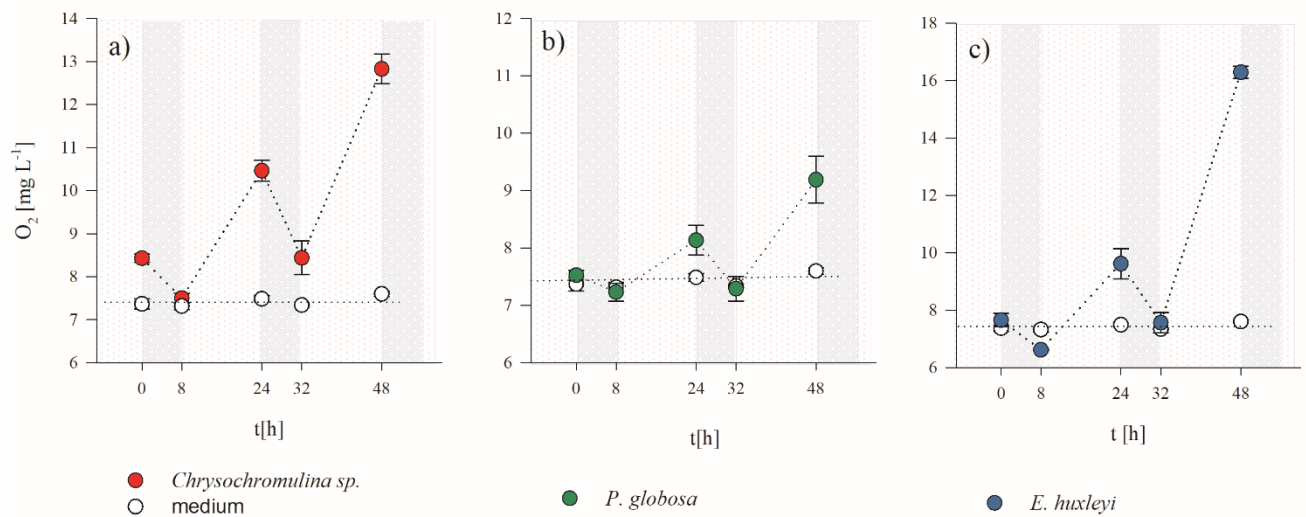

**S2: Dissolved oxygen concentration in dark and light periods of three algae species *Chrysochromulina sp.*, *P. globosa* and *E. huxleyi*. Mean values of four replicated culture experiments are shown and error bars mark the SD. White and grey shading mark the light and dark periods.**
